# Supplementary material for: Single-Source Pulsed Laser Deposited Perovskite Solar Cells with &gt;19% Efficiency
Source: Research Square preprint supplement (doi:10.21203/rs.3.rs-3671187/v1), 2023-11-29
Supplement: Supplementary file 1 [file a9d7fa1747f1d066c1132f6d.docx]

**Supporting Information**

**Single-Source Pulsed Laser Deposited Perovskite Solar Cells**

**with >19% Stable Efficiency**

Tatiana Soto-Montero,1 Suzana Kralj,1 Randi Azmi,2 Manuel A. Reus,3 Junia S. Solomon,1 Daniel M. Cunha,1 Wiria Soltanpoor,1 Drajad Satrio Utomo,2 Esma Ugur,2 Badri Vishal,2 Martin Ledinsky,5 Peter Müller-Buschbaum,3,4 Finn Babbe,6 Do Kyoung Lee,7,8 Carolin M. Sutter-Fella,7 Erkan Aydin,2 Stefaan De Wolf,2 Monica Morales-Masis1*

1MESA+ Institute for Nanotechnology, University of Twente, Enschede 7500 AE, The Netherlands

2Physical Sciences and Engineering Division, KAUST Solar Center, King Abdullah University of Science and Technology (KAUST), Thuwal 23955-6900, Kingdom of Saudi Arabia.

3Technical University of Munich, TUM School of Natural Sciences, Department of Physics, Chair for Functional Materials, James-Franck-Str. 1, 85748 Garching, Germany

4Technical University of Munich, Heinz Maier-Leibnitz-Zentrum (MLZ), Lichtenbergstr. 1, 85748 Garching, Germany

5Institute of Physics, Academy of Science of the Czech Republic, Cukrovarnická 10, Prague 162 00, Czech Republic

6Chemical Science Division, Liquid Sunlight Alliance (LiSA), Lawrence Berkeley National Laboratory, Berkeley, California 94720, United States

7Molecular Foundry Division, Lawrence Berkeley National Laboratory, 1 Cyclotron Road, Berkeley, California 94710, United States

8Nevada Extreme Conditions Laboratory, University of Nevada, Las Vegas (UNLV), Las Vegas, Nevada 89154, United States


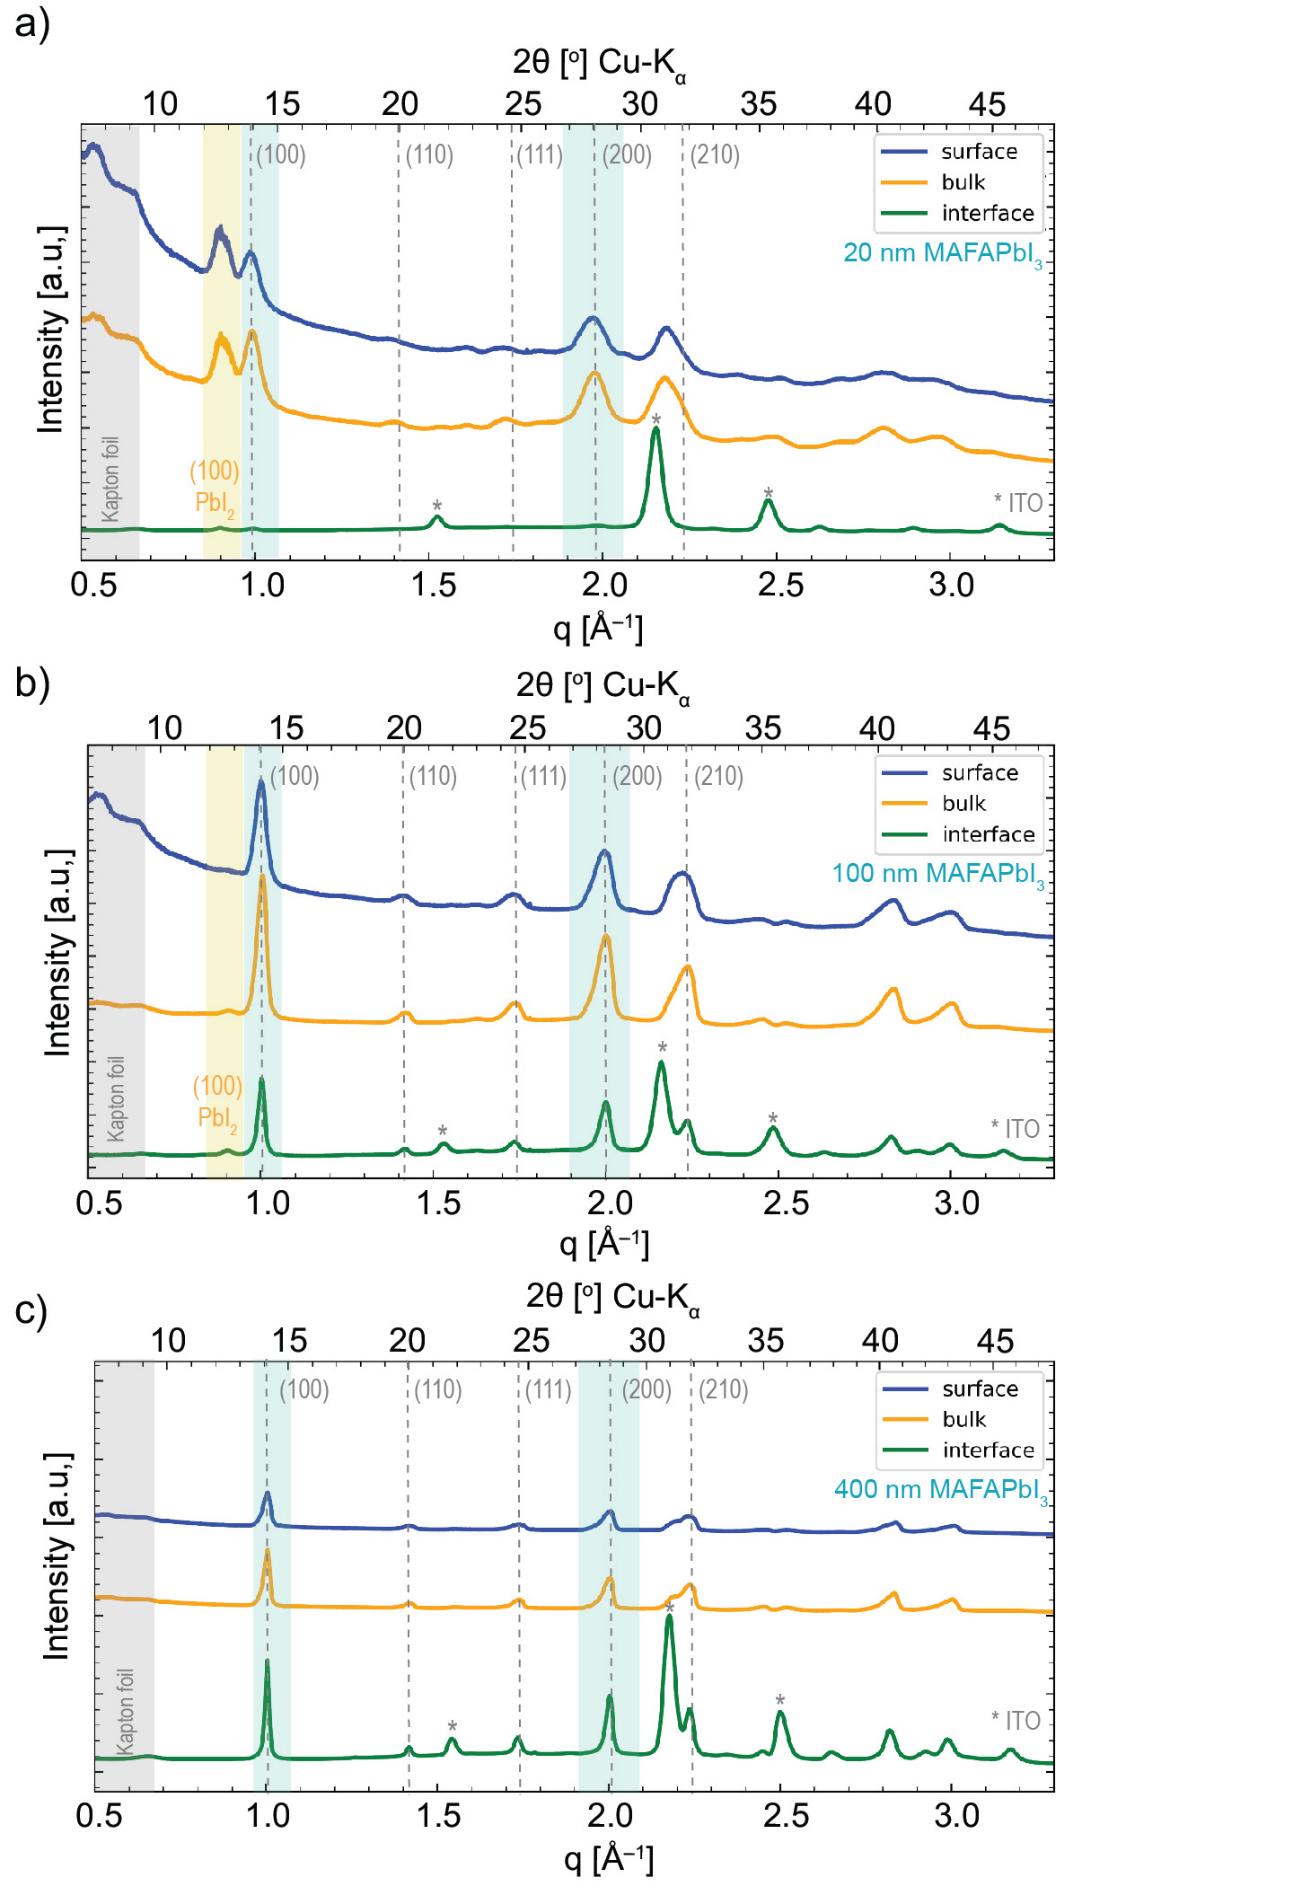


**Fig 1.** Pseudo XRD of a) 20, b) 100, and c) 400 nm thick films of PLD-grown MA1-xFAxPbI3 on ITO/2PACz stack measured at three different incident angles.


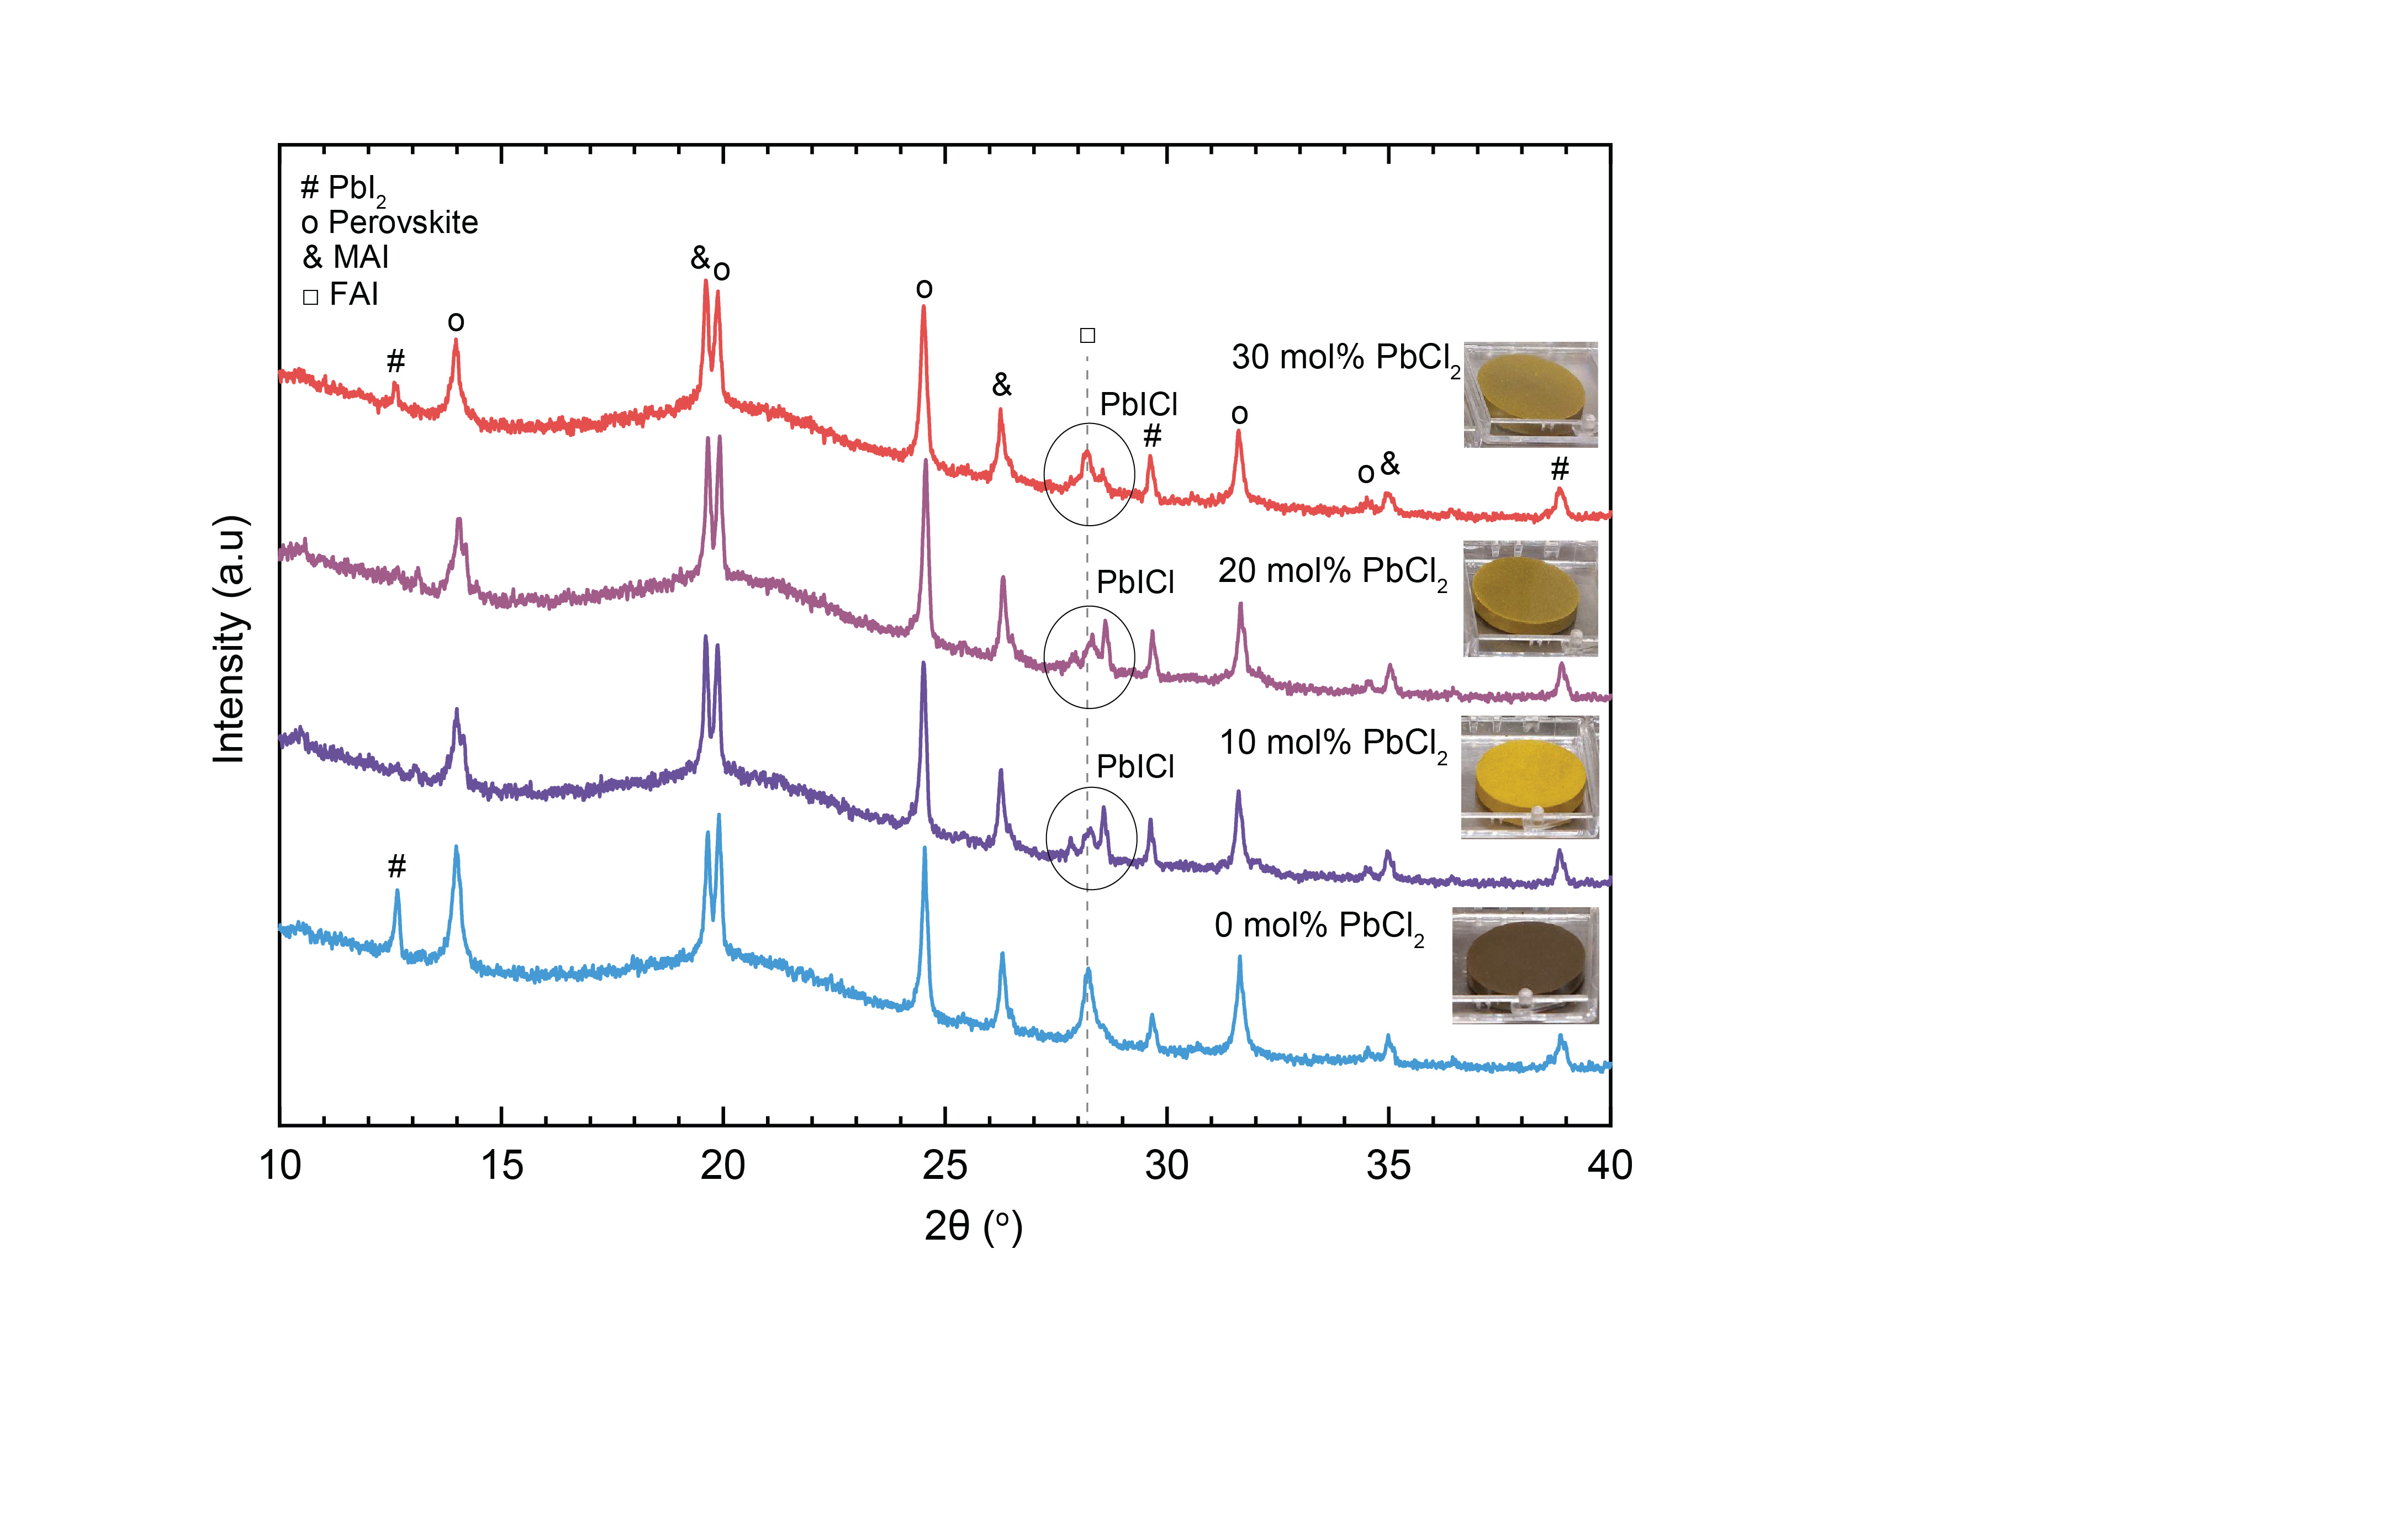


**Fig 2.** XRD pattern of PLD targets used as single sources to deposit MA1-xFAxPbI3 thin films containing from 0 to 30 mol% PbCl2 with respect to PbI2. Inset photos of the targets with varying color due to the different mol% PbCl2 content. It is worth noting that the 8: 1 excess of organic : inorganic compounds is the reason of some of the intense signals corresponding to the FAI or MAI precursors.1


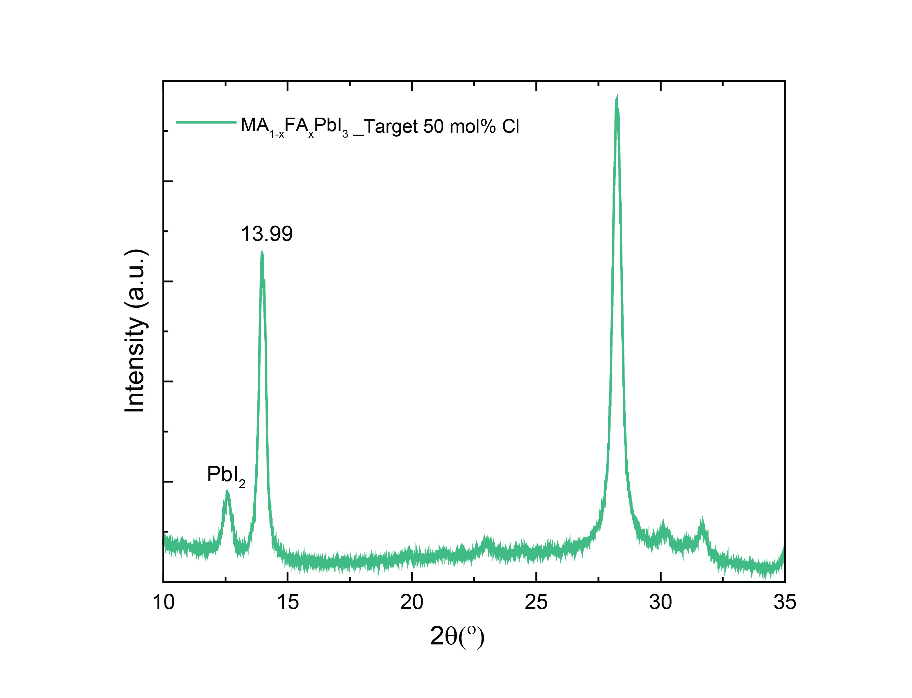


**Fig 3.** XRD pattern of PLD-grown MA1-xFAxPbI3 thin film on ITO/2-PACz stack from a source containing 50 mol% PbCl2.


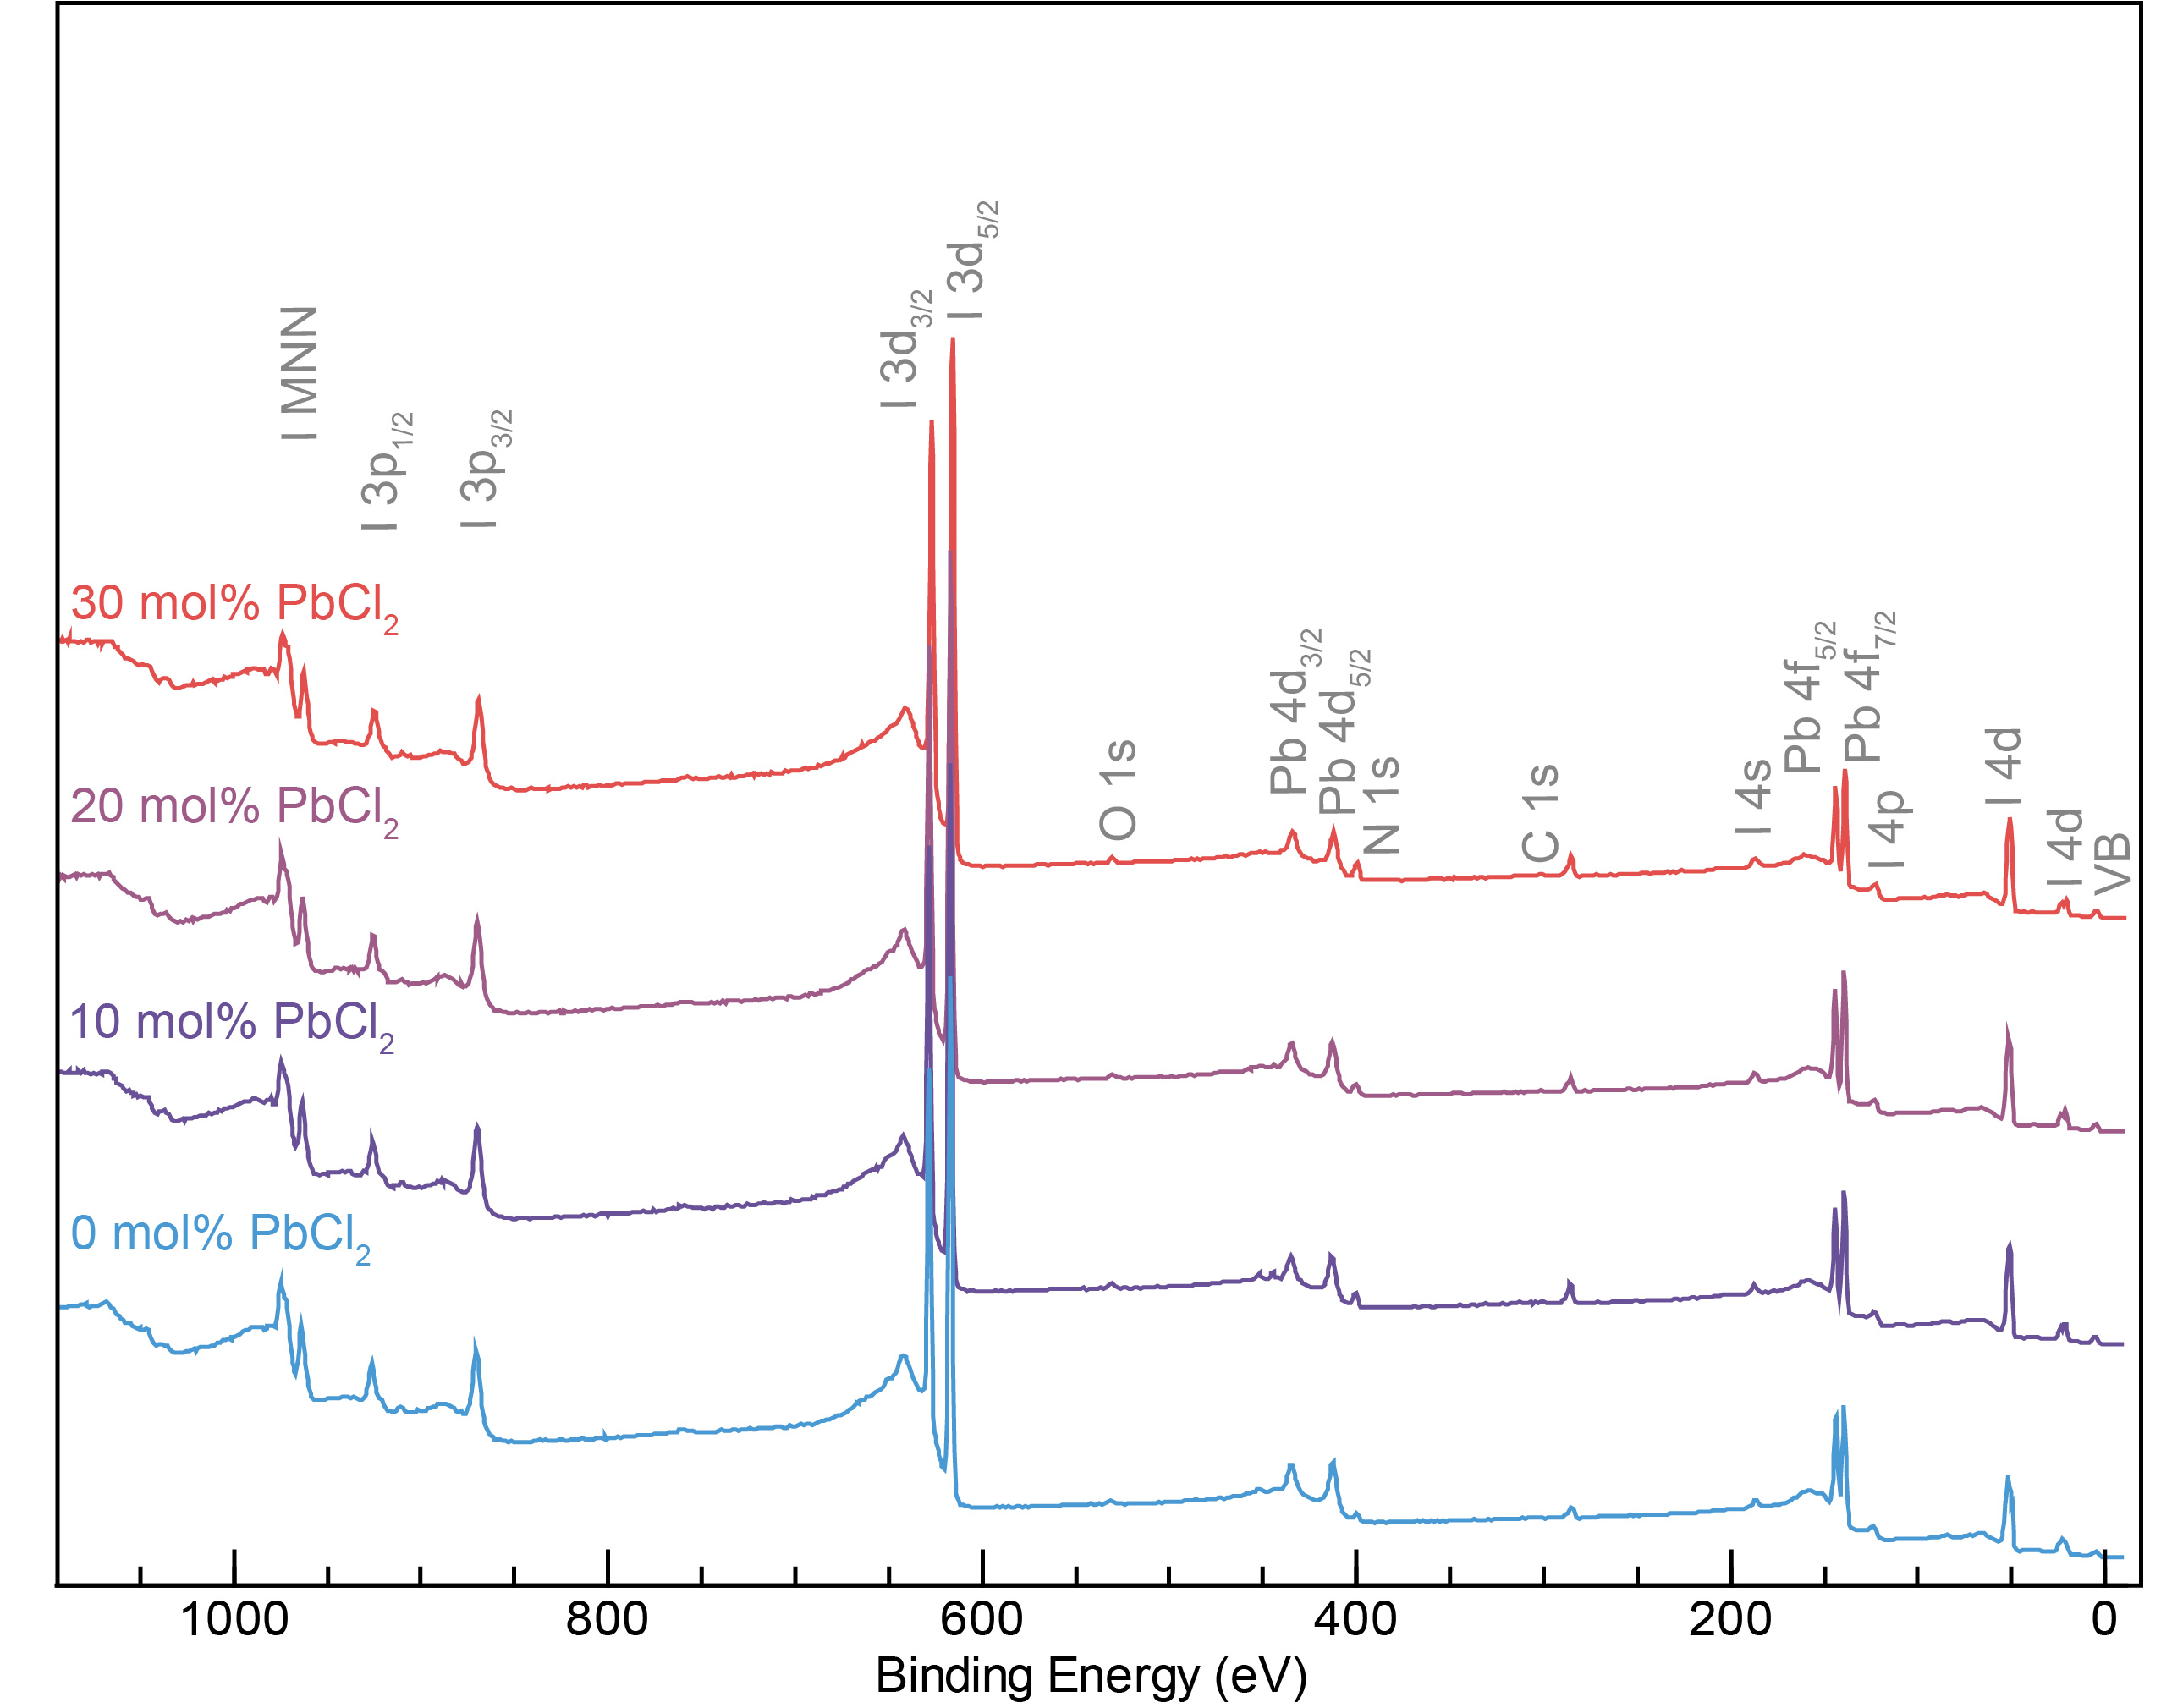


**Fig 4.** XPS survey spectra displaying major elements (Pb, I, C, and N) and I 3p, I 3d, Pb 4d, N 1s, C 1s, I 4s, Pb 4f, I 4p, and I 4d core levels of MA1-xFAxPbI3(Cl)y thin films grown from PLD targets with varying mol% PbCl2.


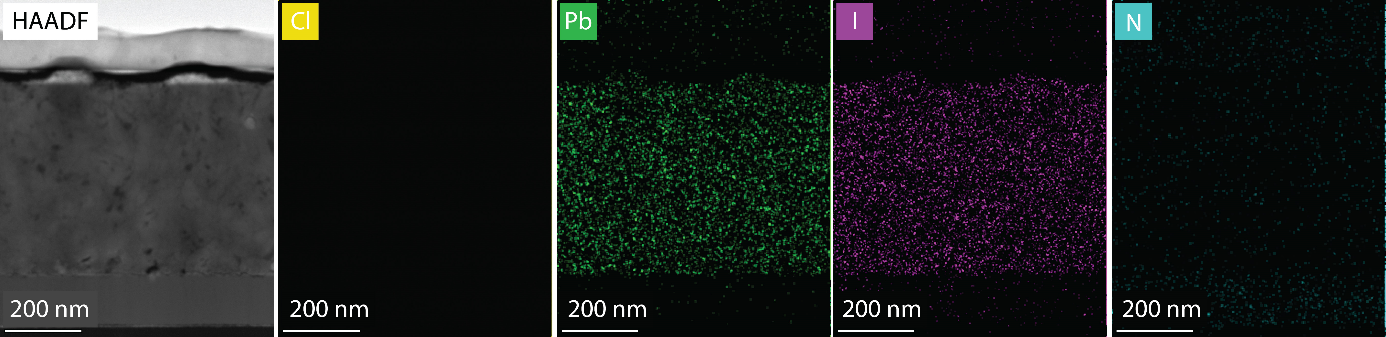


**Fig 5.** High-angle annular dark-field imaging (HAADF-STEM) image and the corresponding elemental mapping analysis of MA1-xFAxPbI3(Cl)y thin films grown from a 20 mol% PbCl2 source.


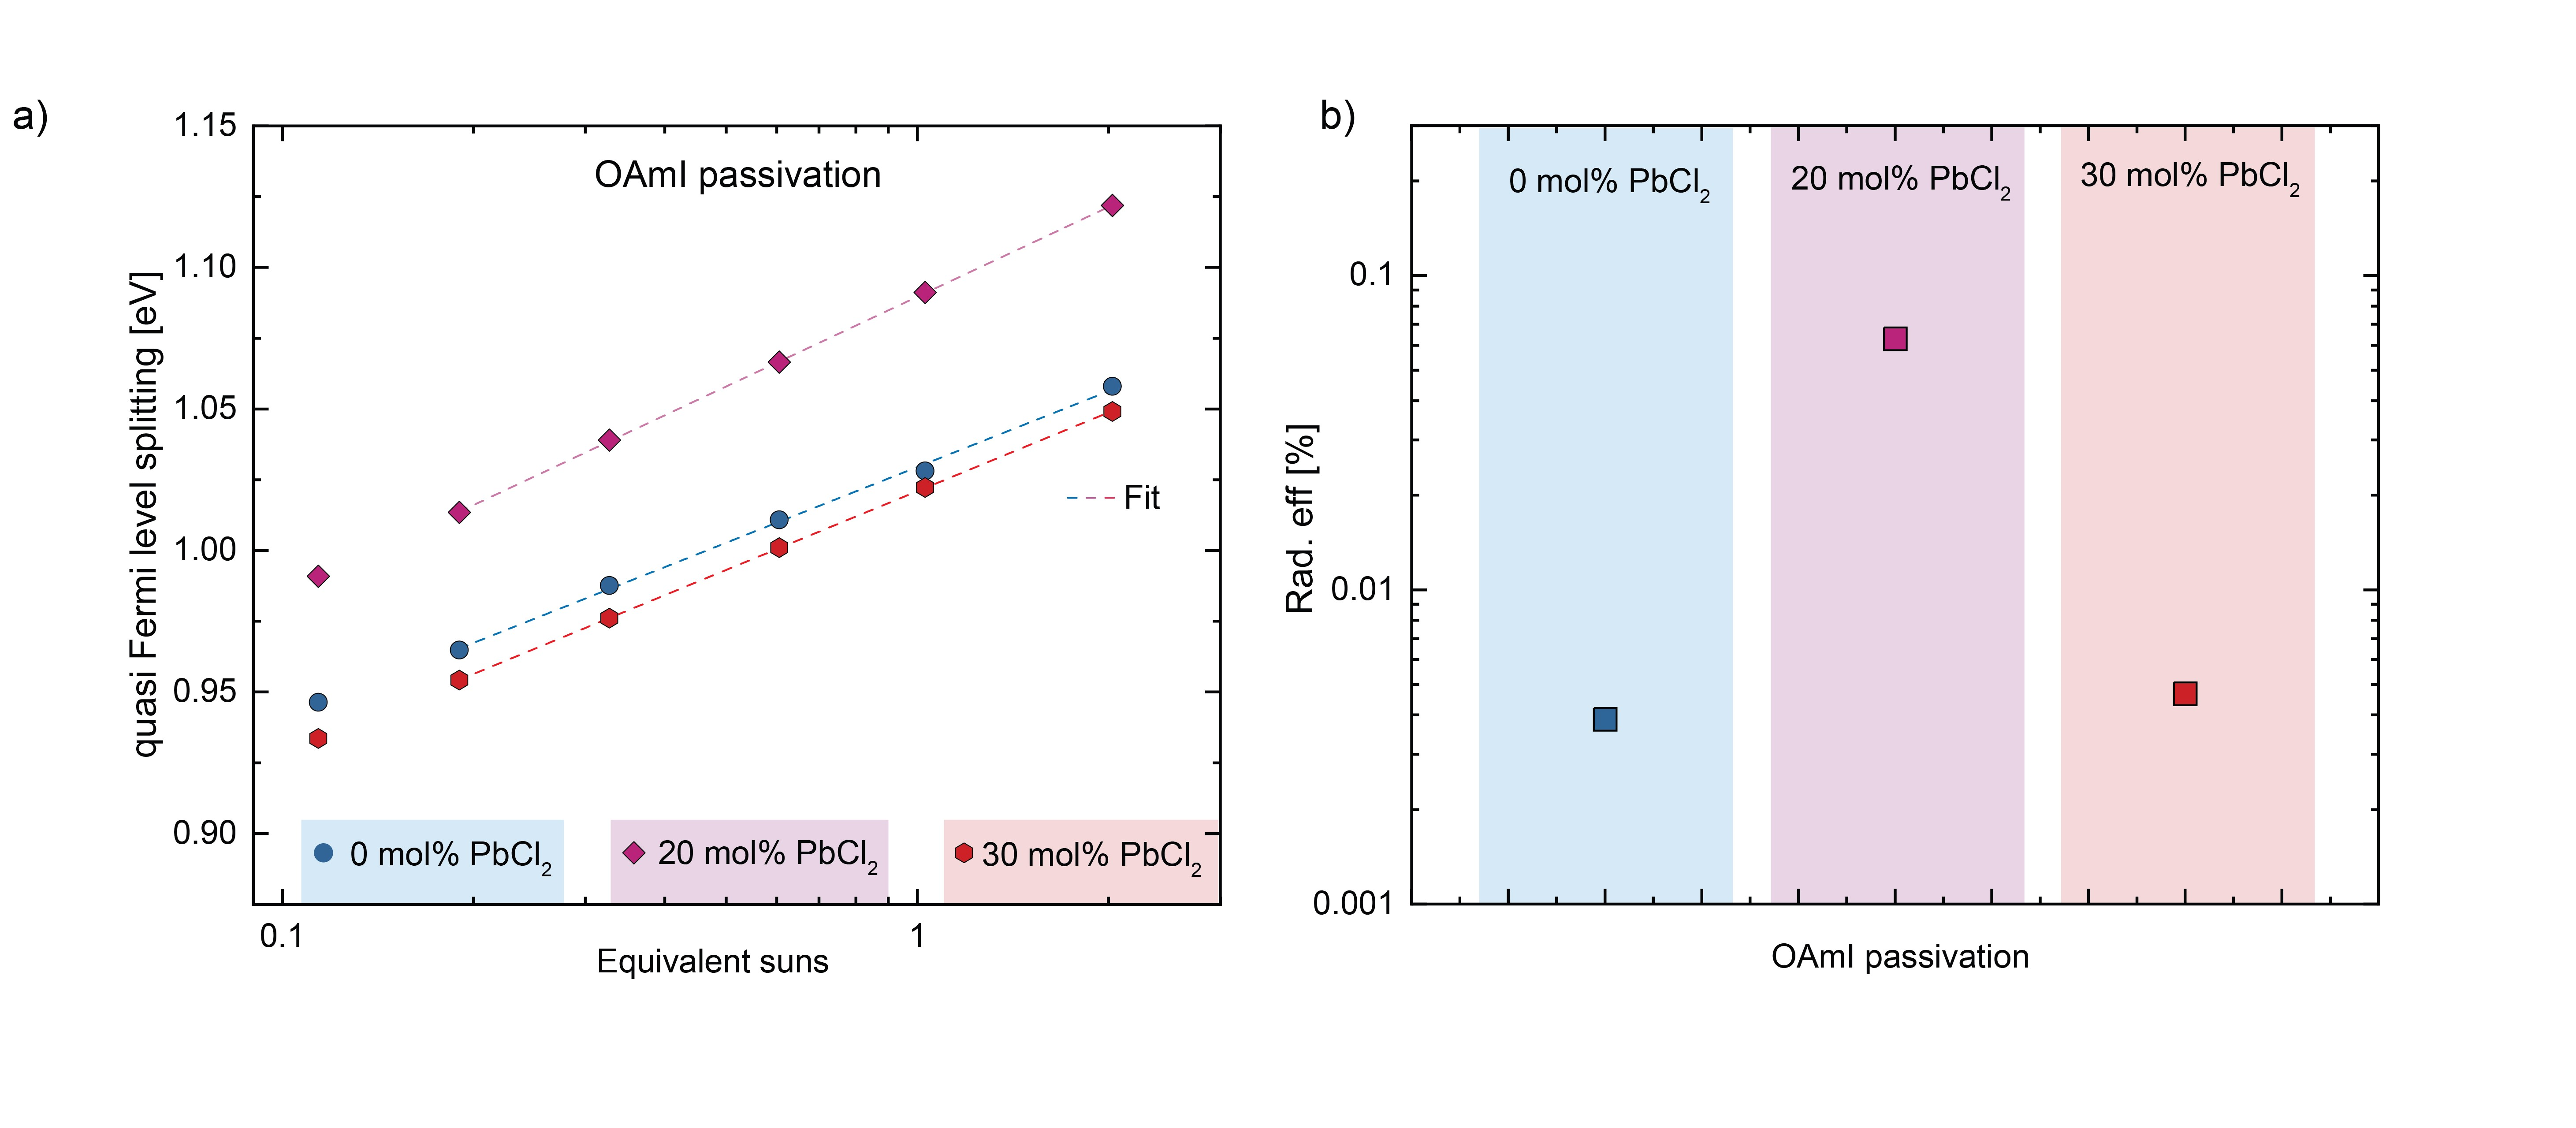


**Fig 6**. **a)** QFLS measured at RT for OAmI-passivated PLD-grown samples on glass from targets without and with PbCl2 plotted over the equivalent illumination used for excitation. **b)** Calculated radiative efficiency of passivated-PLD grown perovskite films.

**Table 1**. Spectral features table of MA1-xFAxPbI3(Cl)y thin films from 0 to 30% mol PbCl2 PLD targets.2,3

| Sample ID |  | Element/  Transition | Peak Energy (eV) | Peak Width (FWHM) (eV) | Sensitivity factor | Peak assignment |
| --- | --- | --- | --- | --- | --- | --- |
|  |  | | | | | |
| 0 mol % PbCl2 |  | Pb 4f7/2 | 139.6 | 1.43 | 12.73 | **Pb-I** |
|  | Pb 4f5/2 | 144.4 | 1.43 | 10.01 |
|  | I 3d5/2 | 616.1 | 1.47 | 19.87 | Pb-**I** |
|  | I 3d3/2 | 627.4 | 1.47 | 13.77 |
|  | C 1s | 285.0 | 2.40 | 1.0 | **C**-(C-H) |
|  | C 1s | 286.7 | 2.40 | 1.0 | NH3-**C**-H (MA+) |
|  | C 1s | 288.7 | 2.40 | 1.0 | NH2-**C**-H (FA+) |
|  | N 1s | 401.4 | 1.86 | 1.8 | **N**H3-C-H (MA+) |
|  | N 1s | 400.0 | 1.86 | 1.8 | **N**H2-C-H (FA+) |
|  | VBM |  |  |  |  |
|  |  |  |  |  |  |  |
| 10 mol % PbCl2 |  | Pb 4f7/2 | 139.5 | 1.72 | 12.73 | **Pb-I** |
|  | Pb 4f5/2 | 144.4 | 1.72 | 10.01 |
|  | I 3d5/2 | 617.0 | 1.40 | 19.87 | Pb-**I** |
|  | I 3d3/2 | 628.3 | 1.40 | 13.77 |
|  | C 1s | 285.0 | 1.58 | 1.0 | **C**-(C-H) |
|  | C 1s | 286.4 | 1.58 | 1.0 | NH3-**C**-H (MA+) |
|  | C 1s | 288.5 | 1.58 | 1.0 | NH2-**C**-H (FA+) |
|  | N 1s | 401.7 | 1.39 | 1.8 | **N**H3-C-H (MA+) |
|  | N 1s | 400.0 | 1.39 | 1.8 | **N**H2-C-H (FA+) |
|  | VBM |  |  |  |  |
|  |  |  |  |  |  |  |
| 20 mol % PbCl2 |  | Pb 4f7/2 | 139.3 | 1.24 | 12.73 | **Pb-I** |
|  | Pb 4f5/2 | 144.1 | 1.24 | 10.01 |
|  | I 3d5/2 | 617.1 | 1.38 | 19.87 | Pb-**I** |
|  | I 3d3/2 | 628.4 | 1.38 | 13.77 |
|  | C 1s | 285.1 | 1.64 | 1.0 | **C**-(C-H) |
|  | C 1s | 286.4 | 1.64 | 1.0 | NH3-**C**-H (MA+) |
|  | C 1s | 288.4 | 1.64 | 1.0 | NH2-**C**-H (FA+) |
|  | N 1s | 401.7 | 1.36 | 1.8 | **N**H3-C-H (MA+) |
|  | N 1s | 400.0 | 1.36 | 1.8 | **N**H2-C-H (FA+) |
|  | VBM |  |  |  |  |
|  |  |  |  |  |  |  |
| 30 mol % PbCl2 |  | Pb 4f7/2 | 139.1 | 1.24 | 12.73 | **Pb-I** |
|  | Pb 4f5/2 | 144.0 | 1.24 | 10.01 |
|  | I 3d5/2 | 615.9 | 1.38 | 19.87 | Pb-**I** |
|  | I 3d3/2 | 627.2 | 1.38 | 13.77 |
|  | C 1s | 285.0 | 1.50 | 1.0 | **C**-(C-H) |
|  | C 1s | 286.3 | 1.50 | 1.0 | NH3-**C**-H (MA+) |
|  | C 1s | 288.3 | 1.50 | 1.0 | NH2-**C**-H (FA+) |
|  | N 1s | 401.3 | 1.35 | 1.8 | **N**H3-C-H (MA+) |
|  | N 1s | 399.6 | 1.35 | 1.8 | **N**H2-C-H (FA+) |
|  | VBM |  |  |  |  |

**Table 2.** Perovskite solar cells parameters overview for the best pixel and average devices.

|  | | VOC (mV) | JSC (mA/cm2) | FF (%) | Efficiency (%) |
| --- | --- | --- | --- | --- | --- |
| MAFA | Best pixel | 985.7 | 21.3 | 70.2 | 14.7 |
| Average | 985.4 | 21.3 | 69.3 | 14.5 |
| MAFA(Cl)y | Best pixel | 991.8 | 21.0 | 75.0 | 15.6 |
| Average | 995.3 | 20.7 | 75.1 | 15.5 |
| MAFA/2D | Best pixel | 1136.9 | 21.6 | 78.0 | 19.1 |
| Average | 1120.1 | 21.3 | 76.6 | 18.3 |
| MAFA(Cl)y/2D | Best pixel | 1155.5 | 21.6 | 79.4 | 19.7 |
| Average | 1137.7 | 21.5 | 78.2 | 19.1 |

**Table 3.** Single-source vapor deposition methods reporting solar cell devices of different compositions.

| Ref. | Method | Composition | Reported PCE (%) | Reported Stability | Reported growth mechanisms insights |
| --- | --- | --- | --- | --- | --- |
| a | PLD | MAPbI3 | 6.7 | X | X |
| b | MAPbI3 | 10.9 | X | X |
| c | MAPb(IyCl1-y)3 | 7.7 | X | X |
| d | MAxFA1-xPbI3 | 9.9, 14.0 | X | ✓ |
| *This work* | MAxFA1-xPbI3 , MAxFA1-xPbI3(Cl)y | 19.2, 19.7 | ✓ | ✓ |
| e | CsPbBr3 | 6.3 | X | X |
| f | Sputtering | MAPbI3 , MAxPbI3(Cl)y | 4.7, 15.2 | X | X |
| g | Flash evaporation | MAPbI3 | 10.0 | ✓ | ✓ |
| h | MAPbI3 | 12.2 | X | X |
| i | MAPbI3 | 16.8 | X | X |
| j | CsPb(IyBr1-y)3 | 12.2 | X | X |
| k | Thermal evaporation | MAPbI3 | 9.9 | X | X |
| l | MAPbI3 | 10.8 | X | X |
| m | CsPbBr3 | 8.7 | ✓ | ✓ |
| n | Cs(Sn1-yPby)Br3 | 9.0 | ✓ | X |
| o | Electron beam evaporation | CsPbBr3 | 7.8 | X | X |
| p | RIR-MAPLE | MAPbI3 | 12.2 | X | X |

a11. Soto-Montero, T. *et al.* Single-Source Pulsed Laser Deposition of MAPbI3. *2021 IEEE 48th Photovolt. Spec. Conf.* 1318–1323 (2021).

b22. Bansode, U. & Ogale, S. On-axis pulsed laser deposition of hybrid perovskite films for solar cell and broadband photo-sensor applications. *J. Appl. Phys.* **121**, (2017).

c33. Bansode, U., Naphade, R., Game, O., Agarkar, S. & Ogale, S. Hybrid perovskite films by a new variant of pulsed excimer laser deposition: A roomerature dry process. *J. Phys. Chem. C* **119**, 9177–9185 (2015).

d44. Soto-Montero, T. *et al.* Single-Source Vapor-Deposition of MA1–xFAxPbI3 Perovskite Absorbers for Solar Cells. *Adv. Funct. Mater.* 2300588 (2023).

e55. Wang, H. *et al.* Pulsed Laser Deposition of CsPbBr3 Films for Application in Perovskite Solar Cells. *ACS Appl. Energy Mater.* **2**, 2305–2312 (2019).

f66. Gao, B. *et al.* Organic-Inorganic Perovskite Films and Efficient Planar Heterojunction Solar Cells by Magnetron Sputtering. *Adv. Sci.* **2102081**, 1–10 (2021).

g77. Xu, H. *et al.* Grain growth study of perovskite thin films prepared by flash evaporation and its effect on solar cell performance. *RSC Adv.* **6**, 48851–48857 (2016).

h88. Longo, G., Gil-Escrig, L., Degen, M. J., Sessolo, M. & Bolink, H. J. Perovskite solar cells prepared by flash evaporation. *Chem. Commun.* **51**, 7376–7378 (2015).

i99. Tai, M. *et al.* Laser-Induced Flash-Evaporation Printing CH3NH3PbI3 Thin Films for High-Performance Planar Solar Cells. *ACS Appl. Mater. Interfaces* **10**, 26206–26212 (2018).

j1010. Tai, M. *et al.* Efficient Inorganic Cesium Lead Mixed-Halide Perovskite Solar Cells Prepared by Flash-Evaporation Printing. *Energy Technol.* **7**, 1–6 (2019).

k1111. Peng, H. *et al.* High-Quality Perovskite CH3NH3PbI3 Thin Films for Solar Cells Prepared by Single-Source Thermal Evaporation Combined with Solvent Treatment. *Materials (Basel).* **12**, (2019).

l1212. Fan, P. *et al.* High-performance perovskite CH3NH3PbI3 thin films for solar cells prepared by single-source physical vapour deposition. *Sci. Rep.* **6**, 1–9 (2016).

m1313. Li, J. *et al.* Fabrication of efficient CsPbBr3 perovskite solar cells by single-source thermal evaporation. *J. Alloys Compd.* **818**, 152903 (2020).

n1414. Abib, M. H. *et al.* Direct deposition of Sn-doped CsPbBr3 perovskite for efficient solar cell application. *RSC Adv.* **11**, 3380–3389 (2021).

o1515. Liu, L., Yang, S.-E., Liu, P. & Chen, Y. High-quality and full-coverage CsPbBr3 thin films via electron beam evaporation with post-annealing treatment for all-inorganic perovskite solar cells. *Sol. Energy* **232**, 320–327 (2022).

p1616. Dunlap-Shohl, W. A. *et al.* MAPbI3 Solar Cells with Absorber Deposited by Resonant Infrared Matrix-Assisted Pulsed Laser Evaporation. *ACS Energy Lett.* **3**, 270–275 (2018).

References

1. Fan, L. *et al.* Elucidating the role of chlorine in perovskite solar cells. *J. Mater. Chem. A* **5**, 7423–7432 (2017).

2. Major, G. H. *et al.* Practical guide for curve fitting in x-ray photoelectron spectroscopy. *J. Vac. Sci. Technol. A* **38**, 061203 (2020).

3. Béchu, S., Ralaiarisoa, M., Etcheberry, A. & Schulz, P. Photoemission Spectroscopy Characterization of Halide Perovskites. *Adv. Energy Mater.* **10**, 1–25 (2020).
